# Supplementary material for: Bilayer chlorophyll derivatives as efficient hole-transporting layers for perovskite solar cells
Source: Royal Society of Chemistry journal article supplement (doi:10.1039/c9qm00377k), 2019-01-01
Supplement: c9qm00377k1.pdf [file c9qm00377k1.pdf]

## Electronic Supplementary Information

# Bilayer chlorophyll derivatives as efficient hole-transporting layers for perovskite solar cells

*Na Li,<sup>a</sup> Chunxiang Dall'Agnese,<sup>a</sup> Wenjie Zhao,<sup>a</sup> Shengnan Duan,<sup>a</sup> Gang Chen,<sup>a</sup> Shin-ichi Sasaki,<sup>bc</sup> Hitoshi Tamiaki,<sup>b</sup> Yoshitaka Sanehira,<sup>d</sup> Tsutomu Miyasaka<sup>d</sup> and Xiao-Feng Wang<sup>\*a</sup>*

<sup>a</sup> Key Laboratory of Physics and Technology for Advanced Batteries, College of Physics, Jilin University, Changchun 130012, P. R. China

<sup>b</sup> Graduate School of Life Sciences, Ritsumeikan University, Kusatsu, Shiga 525-8577, Japan

<sup>c</sup> Nagahama Institute of Bio-Science and Technology, Nagahama, Shiga 526-0829, Japan

<sup>d</sup> Graduate School of Engineering, Toin University of Yokohama, 1614 Kurogane-cho, Aoba, Yokohama, Kanagawa, 225-8503, Japan

### Corresponding Author

Xiao-Feng Wang, *E-mail*: xf\_wang@jlu.edu.cn

### Materials

The preparation of zinc methyl 3-devinyl-3-hydroxymethyl-pyropheophorbide-*a* (Zn-Chl)<sup>S1</sup> and methyl 13<sup>l</sup>-deoxo-13<sup>l</sup>-dicyanomethylene-pyropheophorbide-*a* (H<sub>2</sub>-Chl)<sup>S2</sup> has been reported before. ITO was purchased from Dongguan City Everest Display Technology Co., Ltd. SnO<sub>2</sub> colloidal dispersion (15% in H<sub>2</sub>O) was obtained from Alfa Aesar. MoO<sub>3</sub> was

purchased from Sinopharm Chemical Reagent Co., Ltd. Methylammonium iodide ( $\text{CH}_3\text{NH}_3\text{I}$ , >99.5%) and lead iodide ( $\text{PbI}_2$ , >99.99%) were obtained from Xian Polymer Light Technology Co. The ultra-dry solvents *N,N*-dimethylformamide (DMF, 99.8%), dimethyl sulfoxide (DMSO, 99.7%), and chlorobenzene (CB, 99.8%) were purchased from INFL. Chloroform (CF,  $\geq 99.0\%$ ) was purchased from BEIJING SHIJI Co., Ltd. Tetrahydrofuran (THF,  $\geq 99.9\%$ ) was obtained from Aladdin Industrial Corporation.

### **Fabrication of perovskite solar cells (PSCs)**

The pre-patterned ITO glass substrates were cleaned with detergent, deionized water, ethanol, acetone, CF, and 2-propanol in sequence in the ultrasonic bath for each step 20 minutes, and then treated under ultraviolet ozone for 30 minutes. Then the diluted  $\text{SnO}_2$  colloid dispersion (3% in  $\text{H}_2\text{O}$ ) was spin-coated on the prepared ITO substrates at 3000 rpm for 30 s and annealed at 150 °C for 30 minutes in air to form a compact  $\text{SnO}_2$  thin layer. Subsequently, the substrates were transferred into the glove box. A perovskite precursor solution was prepared by dissolving  $\text{CH}_3\text{NH}_3\text{I}$  ( $1.3 \text{ mol L}^{-1}$ ) and  $\text{PbI}_2$  ( $1.3 \text{ mol L}^{-1}$ ) in DMF:DMSO (4:1, v/v) and stirred for 60 minutes in the glove box at room temperature. Then the perovskite precursor solution was spin-coated on the  $\text{SnO}_2$  thin layer at 5000 rpm for 30 s and CB (360  $\mu\text{L}$ ) was rapidly dropped on the center of substrates after spin-coating for 5 s, then annealed at 100°C for 10 minutes. For the hole-transporting layers, Zn-Chl was dissolved in the mixed solvents of THF and CF at the volume ratio of 4:1 (10  $\text{mg mL}^{-1}$ ) and  $\text{H}_2$ -Chl was dissolved in CF (8  $\text{mg mL}^{-1}$ ), then Zn-Chl and  $\text{H}_2$ -Chl solutions were spin-coated on top of the perovskite at 2000 rpm for 30 s in sequence, and eventually two layers of complete Chl films (bilayer Chl) were formed.<sup>S3</sup> Finally, a 100 nm thick Ag electrode was thermally evaporated on top of the bilayer chlorophyll films to compose a complete PSC device.

### **Measurements of materials and devices**

The ultraviolet–visible–near infrared (UV-VIS-NIR) absorption spectra of Zn-Chl and H<sub>2</sub>-Chl dissolved in THF and Zn-Chl, H<sub>2</sub>-Chl, Zn-Chl/H<sub>2</sub>-Chl films spin-coated on glass were recorded by a Shimadzu UV-3100 spectrophotometer. The scanning electron microscope (SEM) images of Zn-Chl, H<sub>2</sub>-Chl, and Zn-Chl/H<sub>2</sub>-Chl thin films spin-coated on ITO and the cross-sectional SEM image of the devices, ITO/SnO<sub>2</sub>/MAPbI<sub>3</sub>/Zn-Chl and ITO/SnO<sub>2</sub>/MAPbI<sub>3</sub>/Zn-Chl/H<sub>2</sub>-Chl, were obtained from a Hitachi SU8000 field emission scanning electron microscope. The X-ray diffraction (XRD) patterns of these films deposited on glass were measured by using the Bruker D8 X-ray diffractometer at room temperature. The photo-electron spectroscopic data of Zn-Chl and H<sub>2</sub>-Chl films were measured by ionization energy photoelectron yield spectroscopy (IPS) in the vacuum. The hole mobilities of Zn-Chl, H<sub>2</sub>-Chl, and Zn-Chl/H<sub>2</sub>-Chl were measured by the dark current density-voltage ( $J-V$ ) curves of the hole-only devices (ITO/MoO<sub>3</sub>/Chls/MoO<sub>3</sub>/Ag) using space charge limited current (SCLC) method. And the dark  $J-V$  characteristics of the hole-only devices were measured by forward scanning from 0~10 V using a computer-controlled Keithley 2400 source meter measurement system. The  $J-V$  characteristics of the PSCs were measured by a computer-controlled Keithley 2400 source meter measurement system with an AM 1.5G filter at a calibrated intensity of 100 mW cm<sup>-2</sup> illumination, as regulated by a standard silicon reference cell (91150V Oriel Instruments). The incident photon-to-electron conversion efficiency (IPCE) responses of these PSCs were measured under standard measurement conditions by using a commercial IPCE setup (CrowntechQTest Station 1000AD, SOFN INSTRUMENTS CO., LTD). The working area of these PSCs was controlled by a metal mask at 0.04 cm<sup>2</sup>. The steady-state photoluminescence (PL) spectra of these devices (glass/MAPbI<sub>3</sub>, glass/MAPbI<sub>3</sub>/Zn-Chl, and glass/MAPbI<sub>3</sub>/Zn-Chl/H<sub>2</sub>-Chl) were carried out on a PL spectrometer (Shimadzu, RF-530PC) with the excitation wavelength at 403 nm. The electrochemical impedance spectroscopy (EIS) was recorded by using a VSP multichannel potentiostatic-galvanostatic system (Bio-Logic Science Instruments) with the frequency

ranging between 1 MHz and 10 Hz under illumination (AM 1.5G, 100 mW cm<sup>-2</sup>) at 0 V relative to the open-circuit potential. The fitting data of the equivalent circuit model for the impedance spectra were calculated by computer simulation using the Z-view software. The device stability at their maximum power points (MPP) under 1-sun illumination in air was compared using the same galvanostatic-potentiostatic system.

**Table S1** Photovoltaic parameters of the ITO/SnO<sub>2</sub>/MAPbI<sub>3</sub>/H<sub>2</sub>-Chl/Ag device.<sup>a)</sup>

| HTM                 | $V_{oc}$ [V] | $J_{sc}$ [mA cm <sup>-2</sup> ] | FF [%]   | PCE [%]   |
|---------------------|--------------|---------------------------------|----------|-----------|
| H <sub>2</sub> -Chl | 0.87±0.06    | 0.52±0.09                       | 35.0±1.3 | 0.16±0.06 |

<sup>a)</sup> The average values measured for ten independently fabricated devices with standard deviation.

**Table S2** Photovoltaic parameters of the PSC based on Zn-Chl treated with neat CF.<sup>a)</sup>

| HTM    | $V_{oc}$ [V] | $J_{sc}$ [mA cm <sup>-2</sup> ] | FF [%]   | PCE [%]  |
|--------|--------------|---------------------------------|----------|----------|
| Zn-Chl | 0.92±0.03    | 22.2±0.5                        | 56.8±1.6 | 11.6±1.0 |

<sup>a)</sup> The average values measured for ten independently fabricated devices with standard deviation.

**Table S3** Fitting parameters for EIS data of the PSCs based on Chls.

| HTMs                       | $R_s$ [ $\Omega$ ] | $R_{rec}$ [ $\Omega$ ] | CPE-T [F]             | CPE-P |
|----------------------------|--------------------|------------------------|-----------------------|-------|
| Zn-Chl                     | 40.1               | 115                    | $6.11 \times 10^{-9}$ | 0.992 |
| Zn-Chl/H <sub>2</sub> -Chl | 43.3               | 261                    | $7.72 \times 10^{-9}$ | 0.967 |

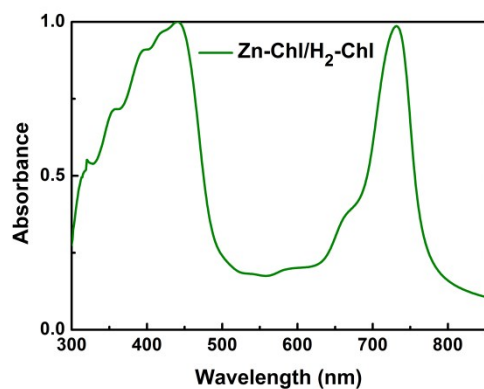

**Fig. S1** UV-VIS-NIR absorption spectrum of bilayer film (Zn-Chl/H<sub>2</sub>-Chl) spin-coated on the glass substrate.

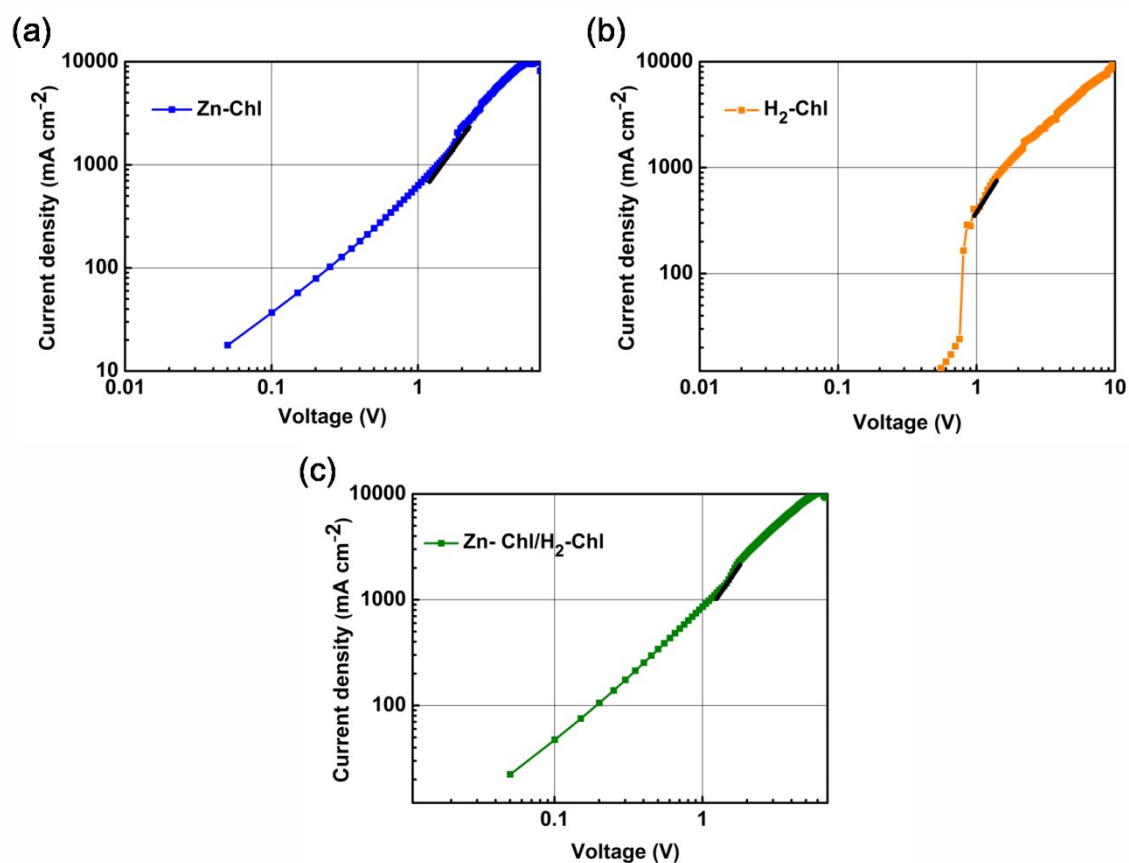

**Fig. S2**  $J$ - $V$  curves of the hole-only devices based on (a) monolayer Zn-Chl or (b) H<sub>2</sub>-Chl and (c) bilayer Zn-Chl/H<sub>2</sub>-Chl in the dark.

The hole mobilities were calculated using the following equation: <sup>S4</sup>

$$J = 9\epsilon_0\epsilon_r\mu V^2(2L)^{-3} \quad (S1),$$

where  $\mu$  is the hole mobility,  $\epsilon_0$  is the permittivity of free space,  $\epsilon_r$  is the relative dielectric constant (assumed to be 3),  $L$  is the thickness of HTLs thin film,  $J$  and  $V$  are the values corresponding to the point of slope=2 in the dark-state  $J$ - $V$  curves (Fig. S2).

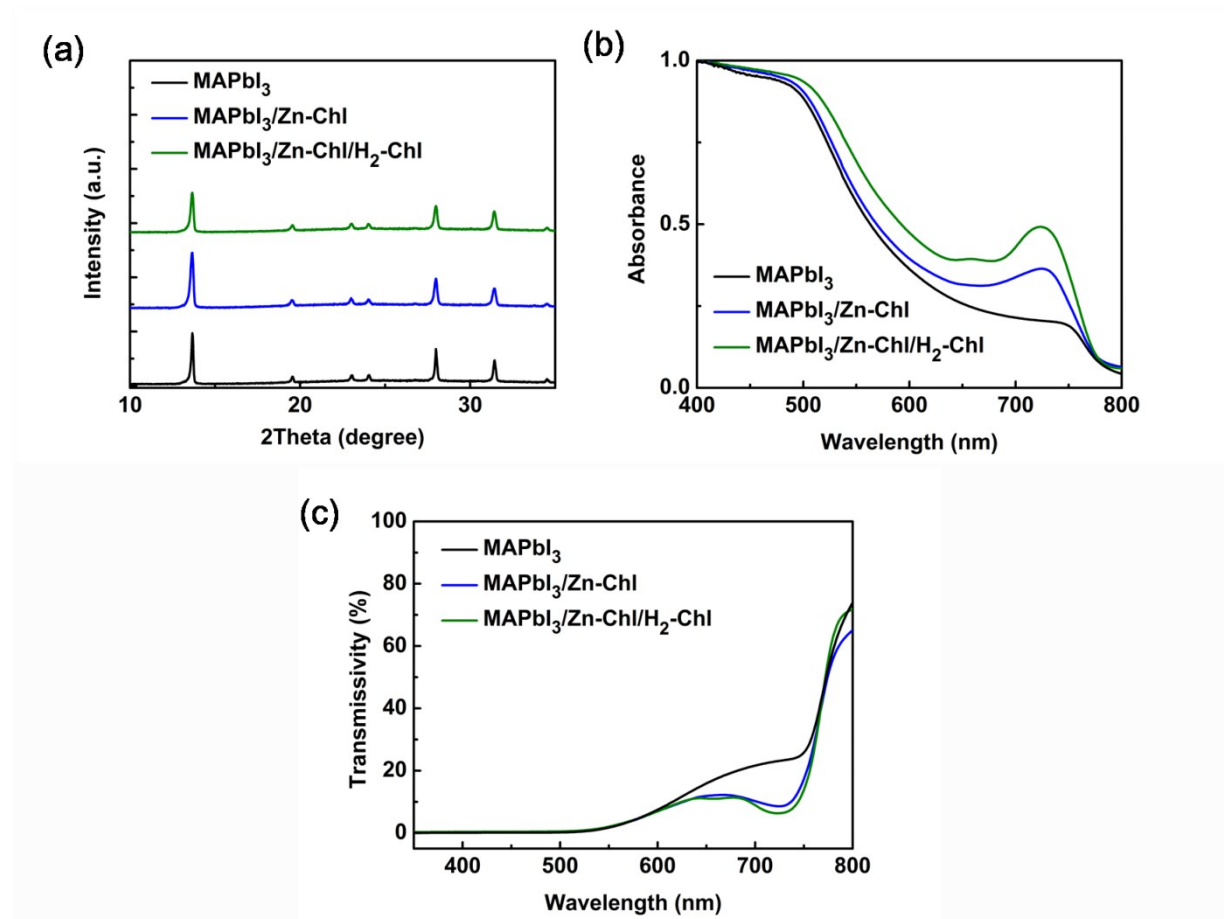

**Fig. S3** (a) The XRD patterns, (b) normalized UV-VIS-NIR absorption spectra, and (c) normalized UV-VIS-NIR transmission spectra of glass/MAPbI<sub>3</sub>, glass/MAPbI<sub>3</sub>/Zn-Chl, and glass/MAPbI<sub>3</sub>/Zn-Chl/H<sub>2</sub>-Chl.

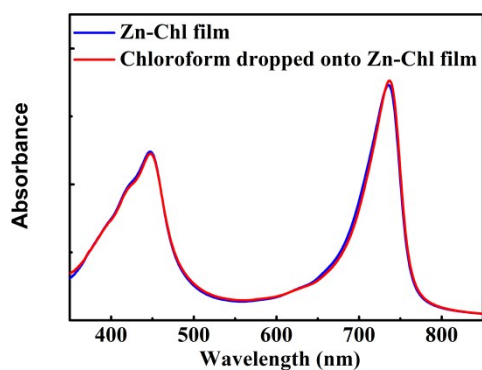

**Fig. S4** Absorption spectra of Zn-Chl thin film (blue line) and the already formed Zn-Chl thin film treated with neat solvent CF only (red line).

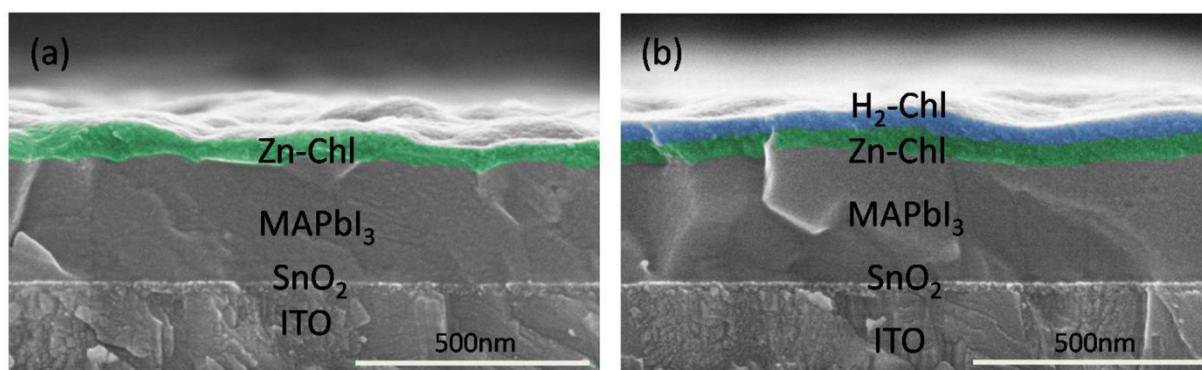

**Fig. S5** The cross-sectional SEM images of the device with structures of (a) ITO/SnO<sub>2</sub>/MAPbI<sub>3</sub>/Zn-Chl and (b) ITO/SnO<sub>2</sub>/MAPbI<sub>3</sub>/Zn-Chl/H<sub>2</sub>-Chl.

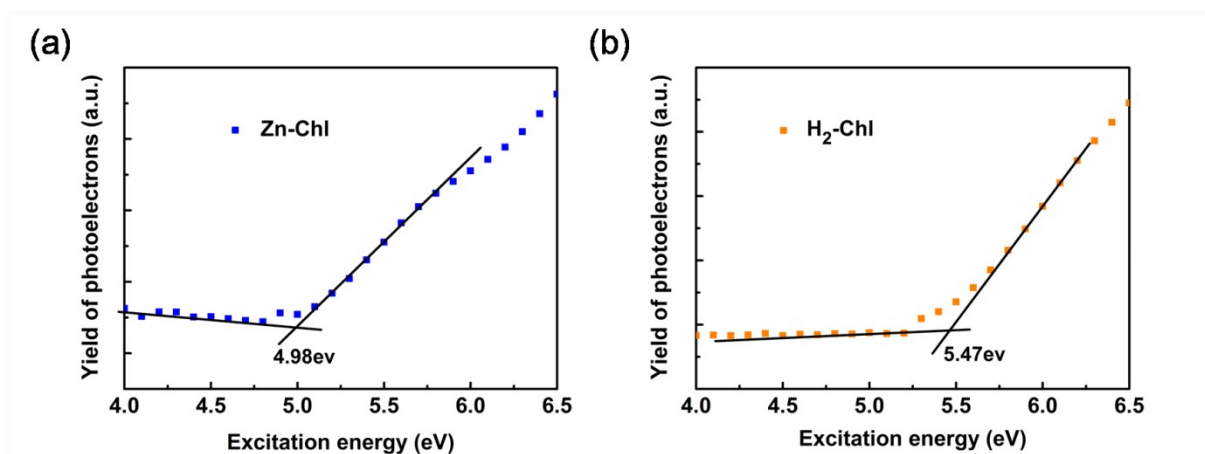

**Fig. S6** The HOMO energy levels of (a) Zn-Chl and (b) H<sub>2</sub>-Chl thin films examined by IPS.

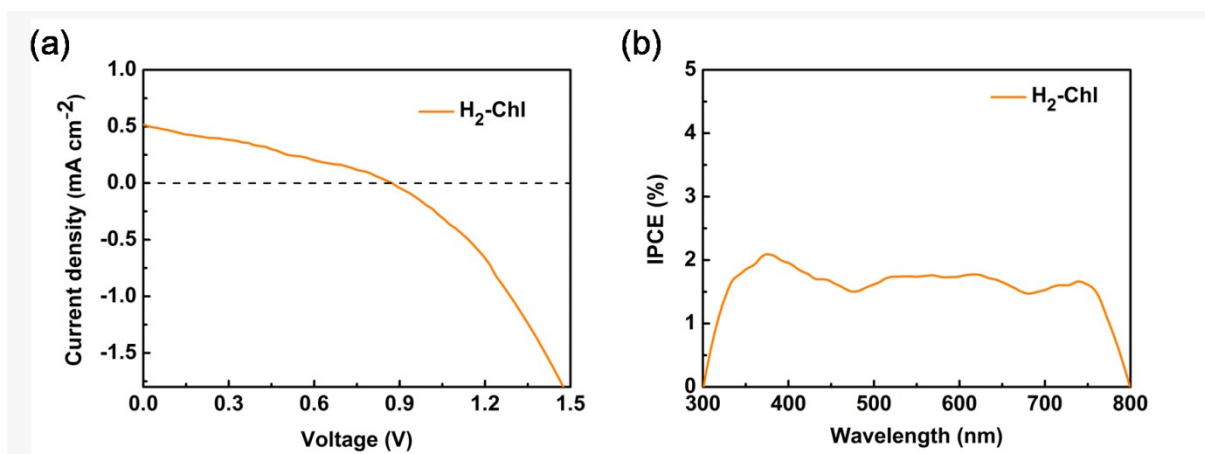

**Fig. S7** (a) *J-V* curve and (b) IPCE spectra of the ITO/SnO<sub>2</sub>/MAPbI<sub>3</sub>/H<sub>2</sub>-Chl/Ag device under standard AM1.5G illumination.

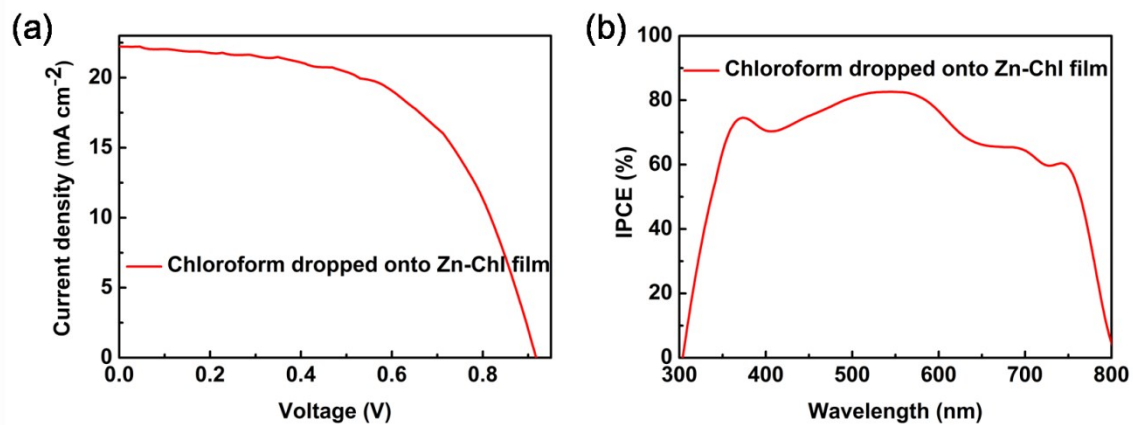

**Fig. S8** (a)  $J$ - $V$  curve and (b) IPCE spectra of the PSC based on Zn-Chl treated with solvent CF only under standard AM1.5G illumination.

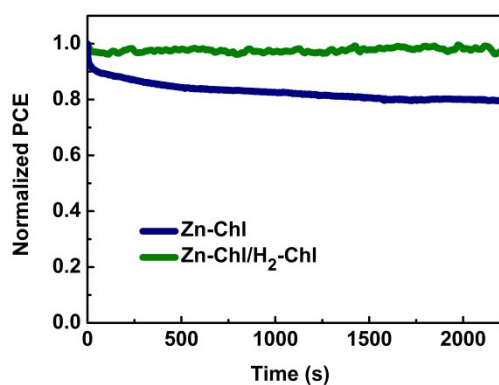

**Fig. S9** Stability tracking over time of unencapsulated PSCs based on Zn-Chl and Zn-Chl/H<sub>2</sub>-Chl at MMP under 1-sun illumination in air.

## References

- S1. H. Tamiaki, M. Amakawa, Y. Shimonono, R. Tanikaga, A. R. Hotzwarth and K. Schaffner, *Photochem. Photobiol.*, 1996, **63**, 92-99.
- S2. S. Sasaki, M. Yoshizato, M. Kunieda and H. Tamiaki, *Eur. J. Org. Chem.*, 2010, 5287-5291.
- S3. S. Duan, C. Dall'Agnese, G. Chen, X.-F. Wang, H. Tamiaki, Y. Yamamoto, T. Ikeuchi and S. Sasaki, *ACS Energy Lett.*, 2018, **3**, 1708-1712.
- S4. J. Song, E. Zheng, X.-F. Wang, W. Tian and T. Miyasaka, *Sol. Energy Mater. Sol. Cells*, 2016, **144**, 623-630.
